# Supplementary material for: Anion-dependent topochemical conversion of CoAl-LDH microplates to hierarchical superstructures of CoOOH nanoplates with controllable orientation
Source: Royal Society of Chemistry journal article supplement (doi:10.1039/d0cc03773g), 2020-01-01
Supplement: d0cc03773g1.pdf [file d0cc03773g1.pdf]

## Electronic Supplementary Information

### Anion-dependent topochemical conversion of CoAl-LDH microplates to hierarchical superstructures of CoOOH nanoplates with controllable orientation

Qingsong Song,<sup>‡a</sup> Jialiang Wang,<sup>‡a</sup> Qian Sun,<sup>‡a</sup> Xiaoshan Wang,<sup>b</sup> Zhaohua Zhu,<sup>a</sup> Chengjie Pei,<sup>a</sup> Hai Li,<sup>a</sup> Zhimin Luo,<sup>\*c</sup> Xiao Huang,<sup>\*a</sup> and Wei Huang<sup>\*a,b,c</sup>

<sup>a</sup>Key Laboratory of Flexible Electronics (KLOFE) & Institute of Advanced Materials (IAM), Nanjing Tech University (NanjingTech), 30 South Puzhu Road, Nanjing 211800, China.

<sup>b</sup>Frontiers Science Center for Flexible Electronics, Xi'an Institute of Flexible Electronics (IFE) and Xi'an Institute of Biomedical Materials & Engineering, Northwestern Polytechnical University, 127 West Youyi Road, Xi'an 710072, China.

<sup>c</sup>Key Laboratory for Organic Electronic & Information Displays (KLOEID) and Jiangsu Key Laboratory for Biosensors, Institute of Advanced Materials (IAM), Nanjing University of Posts and Telecommunications, 9 Wenyuan Road, Nanjing; 210023, China.

#### 1. Experimental Section

##### 1.1 Chemicals and materials

Cobalt (II) nitrate hexahydrate ( $\text{Co}(\text{NO}_3)_2 \cdot 6\text{H}_2\text{O}$ , 99.8%) was purchased from Sinopharm Chemical Reagent Co., Ltd (Shanghai, China). Urea ( $\text{CO}(\text{NH}_2)_2$ , 98%) and NaOH (NaOH, 98%) were purchased from Aladdin (Shanghai, China). Aluminum nitrate nonahydrate ( $\text{Al}(\text{NO}_3)_3 \cdot 9\text{H}_2\text{O}$ ,  $\geq 98\%$ ), thioacetamide ( $\text{CH}_3\text{CSNH}_2$ ,  $\geq 99\%$ ), and Nafion perfluorinated resin solution were purchased from Sigma-Aldrich (Beijing, China). Ethanol ( $\text{C}_2\text{H}_5\text{OH}$ , 99.7%) was purchased from J&K Chemical (Shanghai, China). All chemicals and materials were used without further purification. The deionized (DI) water was purified using a Milli-Q3 system (Millipore, France).

##### 1.2 Synthesis of CoAl-LDH microplates and related composite

According to a previous procedure,<sup>1, 2</sup> pristine CoAl- $\text{CO}_3^{2-}$ -LDH microplates were prepared by the coprecipitation method. In a typical experiment, 0.26 g of

$\text{Co}(\text{NO}_3)_2 \cdot 6\text{H}_2\text{O}$ , 0.034 g of  $\text{Al}(\text{NO}_3)_3 \cdot 9\text{H}_2\text{O}$  (Co:Al = 10:1) and 0.27 g of urea powder were mixed with 100 mL DI water in a beaker and ultrasonicated for 5 min to obtain a homogeneous solution. 30 mL of the above solution was transferred to a 40 mL glass bottle, heated to 97 °C, and maintained at this temperature for 3 h before being naturally cooled to room temperature. The pink precipitate, i.e.  $\text{CoAl-CO}_3^{2-}$ -LDH, was collected and washed three times with ethanol.

15 mL ethanol solution containing 10 mg of the abovementioned pink product and 20 mg of as-purchased thioacetamide powder were mixed in a 20 mL Teflon-lined stainless steel autoclave. The autoclave was placed in a preheated oven at 120 °C and heated for 6.5 h. After that, it was cooled to room temperature, and the dark solution was centrifuged and washed with DI water for several times to obtain  $\text{CoAl-SO}_4^{2-}$ -LDH microplates.

### **1.3 Preparation of CoOOH hierarchical superstructures**

5 mg of as-prepared  $\text{CoAl-CO}_3^{2-}$ -LDH powder was mixed with 15 mL of NaOH aqueous solution (1 M) in a 20 mL glass bottle. The bottle was then placed in a preheated water bath at 30 °C and the solution was stirred for 12 h. Finally, the black powder was immediately centrifuged and washed with DI water for several times to obtain CoOOH-lateral hierarchical superstructures. The preparation method for CoOOH-vertical hierarchical superstructures is similar to that for CoOOH-lateral hierarchical superstructure, except that the concentration of NaOH aqueous solution was 0.75 M and the stirring time was 8 h.

### **1.4 Characterizations**

X-ray diffraction (XRD, SmartLab Rigaku) was performed with Cu K $\alpha$  radiation ( $\lambda = 1.54 \text{ \AA}$ ) as the X-ray source. Fourier transform infra-red (FTIR, Thermo IS5) measurements were performed to analyze the interlayer anions. Scanning electron microscopy (SEM, JSM-7800F) was used for the morphology analysis. To gain the crystal structure information, transmission electron microscopy (TEM, JEM 2100Plus,

Japan), high-resolution transmission electron microscopy (HRTEM, JEM 2100F, Japan), and energy-dispersive X-ray (EDX) spectroscopy analysis were performed.

### 1.5 Electrochemical measurements

A catalyst dispersion was prepared by mixing 2.5 mg of the active material, namely CoOOH-lateral or CoOOH-vertical in a solution containing 10  $\mu\text{L}$  of Nafion (5 wt %) aqueous solution, 400  $\mu\text{L}$  DI water and 100  $\mu\text{L}$  absolute ethanol, followed by ultrasonication for 30 min. 10 or 3  $\mu\text{L}$  of the catalyst dispersion was drop-deposited on the surface of a carbon working electrode (with a diameter of 5 mm) of a screen-printed electrode (SPE) (Neopro, Shandong, China), or a glassy carbon (GC) electrode (with a diameter of 3 mm), respectively, and then dried naturally at room temperature.

Linear sweep voltammetry measurements were conducted on an electrochemical station (Autolab 302N) coupled with a SPE (including a carbon working electrode and a carbon counter electrode) and a 3 M Ag/AgCl reference electrode. The measurements were conducted in 0.1 M KOH at a scan rate of 20  $\text{mV s}^{-1}$  in a saturated  $\text{N}_2$  environment. All measurements were referenced to a reversible hydrogen electrode (RHE) scale based on the Nernst equation below.<sup>3, 4</sup>

$$V_{\text{RHE}} (\text{V}) = V_{\text{Ag/AgCl}} (\text{V}) + 0.0591 \times \text{pH} + V_{\text{Ag/AgCl}}^{\theta}$$

where  $V_{\text{RHE}}$  is the applied potential vs. RHE;  $V_{\text{Ag/AgCl}}$  is the applied potential vs. Ag/AgCl reference electrode, pH is the pH of the electrolyte, and  $V_{\text{Ag/AgCl}}^{\theta}$  is the standard potential of the Ag/AgCl reference electrode.

Electrochemical impedance spectroscopy (EIS) measurements were conducted on the SPE as well in 0.1 M KOH at a potential of 0.35 V by applying an AC voltage with an amplitude of 10 mV over a frequency range of 10 to 100 kHz.

The electrical double-layer capacitance ( $C_{\text{dl}}$ ) of the catalyst deposited on a rotating GC electrode was measured from the double-layer charging curves using cyclic voltammetry (CV) in a small potential range of 1.45-1.49 V (vs. RHE) without apparent

faradaic processes occurring. The rotating speed was set at 1000 rpm. The plot of the different current density at 1.47 V against the scan rate (20-100 mV s<sup>-1</sup>) was linearly fitted, and its slope is the  $C_{dl}$  of the tested catalyst.

## 2. Supplementary Figures

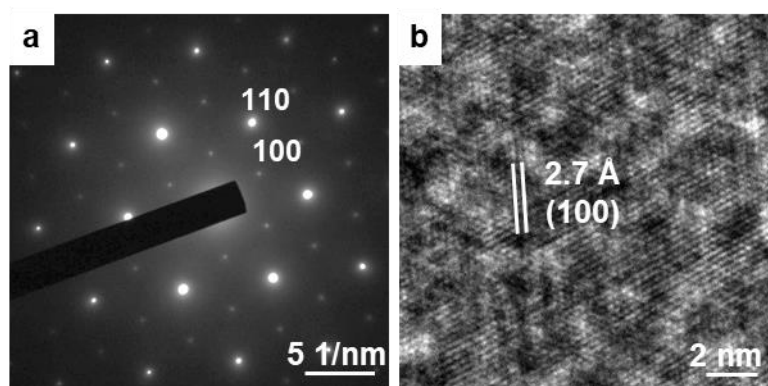

**Fig. S1** (a) SAED pattern and (b) HRTEM image of a typical CoAl-CO<sub>3</sub><sup>2-</sup>-LDH microplate, revealing lattice spacing of ~0.27 nm, assignable to the (100) planes of Co<sub>6</sub>Al<sub>2</sub>(OH)<sub>16</sub>CO<sub>3</sub> (JCPDS 00-051-0054, space group *R-3m*).

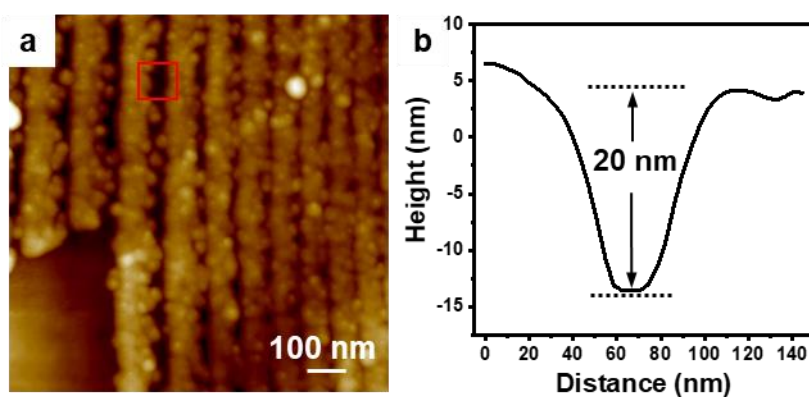

**Fig. S2** (a) AFM image revealing the surface strips of a CoAl-SO<sub>4</sub><sup>2-</sup>-LDH microplate, and (b) the height analysis of the area highlighted in the red rectangle in (a).

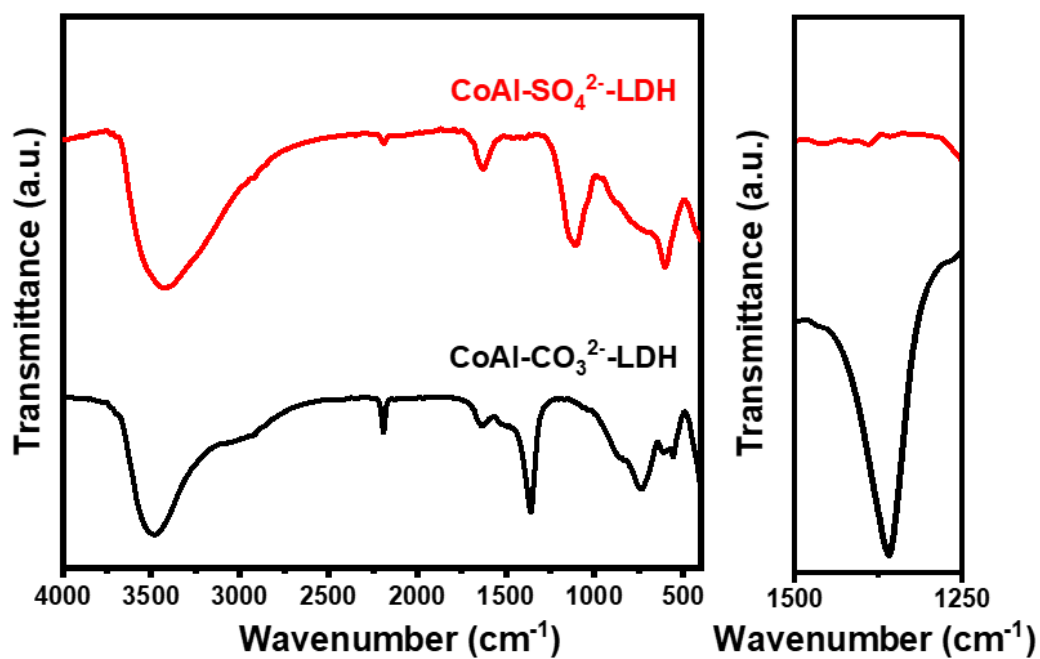

**Fig. S3** FTIR spectra with magnified region between 1500 and 1250 cm<sup>-1</sup> of CoAl-CO<sub>3</sub><sup>2-</sup>-LDH and CoAl-SO<sub>4</sub><sup>2-</sup>-LDH microplates.

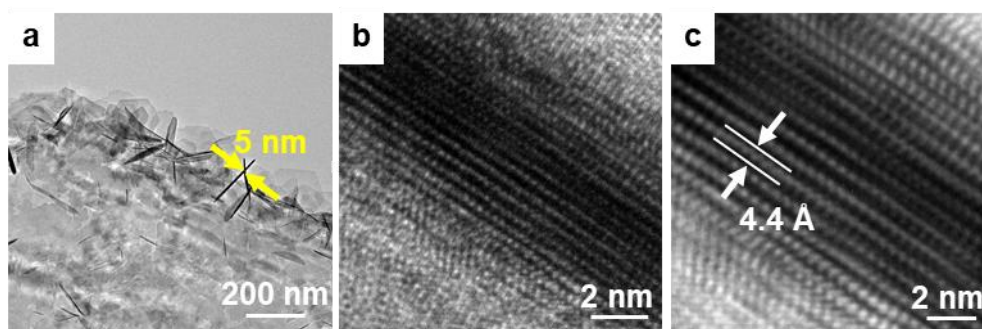

**Fig. S4** (a) Zoom-in TEM image, (b) HRTEM image and (c) the corresponding inverse-FFT HRTEM of a vertically oriented CoOOH nanoplate located at the edge area of a typical CoOOH-lateral hierarchical superstructure.

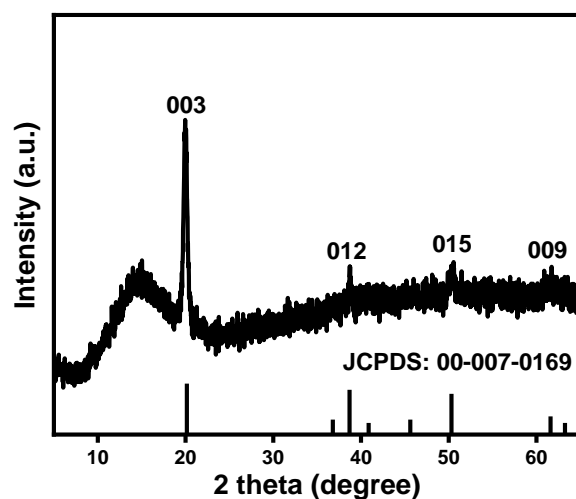

**Fig. S5** XRD pattern of CoOOH-vertical hierarchical superstructure.

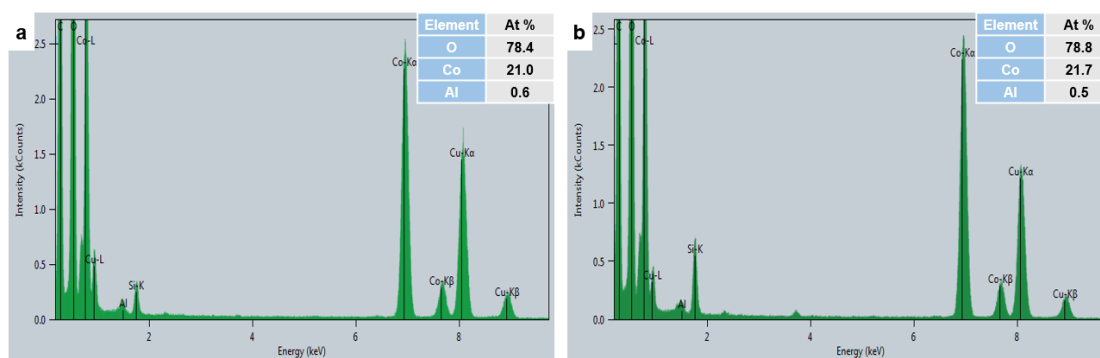

**Fig. S6** EDX spectra of (a) CoOOH-lateral and (b) CoOOH-vertical hierarchical superstructures.

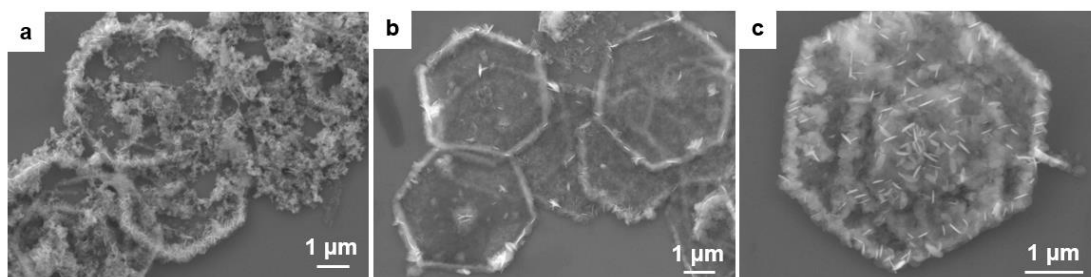

**Fig. S7** SEM images of products obtained after etching (a) CoAl-SO<sub>4</sub><sup>2-</sup>-LDH and (b) CoAl-CO<sub>3</sub><sup>2-</sup>-LDH microplates in 1 M NaOH solution at 30 °C for 12 h. (c) The product of etching CoAl-CO<sub>3</sub><sup>2-</sup>-LDH microplates in 2.5 M NaOH solution at 30 °C for 12 h.

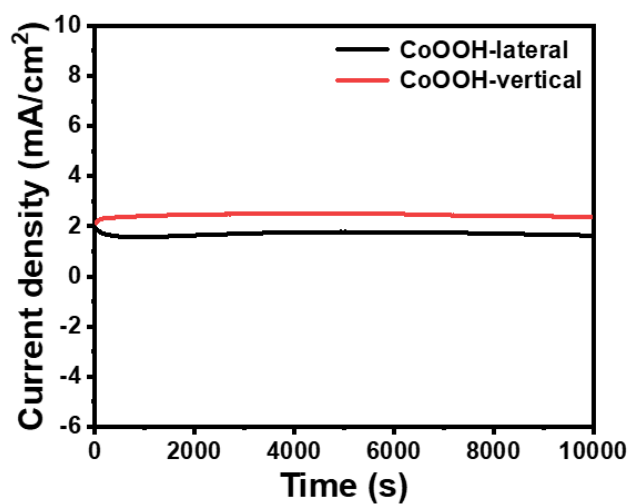

**Fig. S8** Chronoamperometric test results of CoOOH-lateral and CoOOH-vertical hierarchical superstructures in 0.1 M KOH at 1.67 V *vs.* RHE.

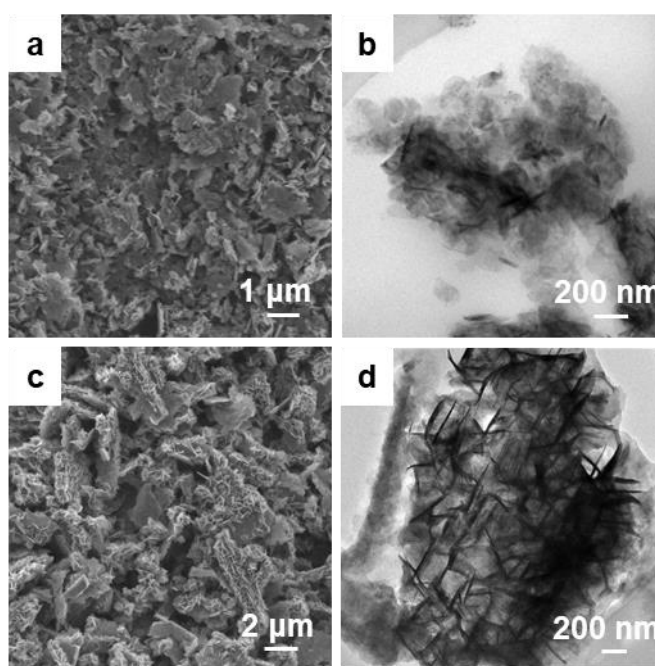

**Fig. S9** (a) SEM image and (b) TEM image of CoOOH-lateral hierarchical superstructures after OER test. (c) SEM image and (d) TEM image of CoOOH-vertical hierarchical superstructures after OER test.

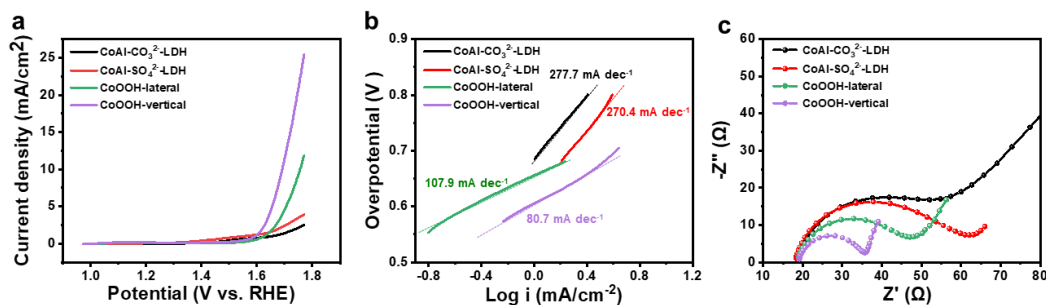

**Fig. S10** (a) OER polarization curves and (b) the corresponding Tafel plots of various electrodes modified by CoAl-CO<sub>3</sub><sup>2-</sup>-LDH, CoAl-SO<sub>4</sub><sup>2-</sup>-LDH, CoOOH-lateral and CoOOH-vertical catalysts in 0.1 M KOH with a scan rate of 20 mV s<sup>-1</sup>. (c) Nyquist plots of the various electrodes modified by CoAl-CO<sub>3</sub><sup>2-</sup>-LDH, CoAl-SO<sub>4</sub><sup>2-</sup>-LDH, CoOOH-lateral and CoOOH-vertical catalysts.

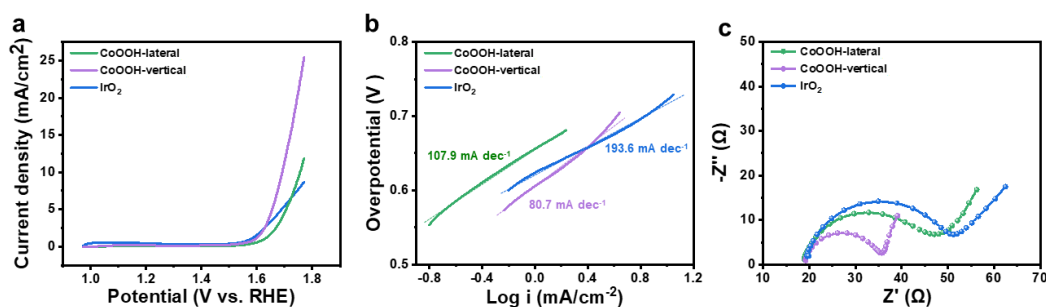

**Fig. S11** (a) OER polarization curves and (b) the corresponding Tafel plots of various electrodes modified by CoOOH-lateral, CoOOH-vertical and IrO<sub>2</sub> catalysts in 0.1 M KOH with a scan rate of 20 mV s<sup>-1</sup>. (c) Nyquist plots of the various electrodes modified by CoOOH-lateral, CoOOH-vertical and IrO<sub>2</sub> catalysts.

## REFERENCES

- 1 Z. Liu, R. Ma, M. Osada, N. Iyi, Y. Ebina, K. Takada and T. Sasaki, *J. Am. Chem. Soc.*, 2006, **128**, 4872.
- 2 A. Inayat, M. Klumpp and W. Schwieger, *Appl. Clay Sci.*, 2011, **51**, 452.
- 3 A. Morozan and F. Jaouen, *Energy Environ. Sci.*, 2012, **5**, 9269.
- 4 Y. Ma, S. R. Pendlebury, A. Reynal, F. Le Formal and J. R. Durrant, *Chem. Sci.*, 2014, **5**, 2964.
